# Supplementary material for: Tracking SARS-CoV-2 in Sewage: Evidence of Changes in Virus Variant Predominance during COVID-19 Pandemic
Source: MDPI journal article supplement (doi:10.3390/v12101144), 2020-10-09
Supplement: s1 [file s1]

**TABLE S2.** Most common nucleotide sequence combinations at 5 selected nucleotide sites in SARS-CoV-2 clinical samples

| Variant | 2480 | 2558 | 3037 | 14408 | 14805 |
|---------|------|------|------|-------|-------|
| 1       | A    | C    | C    | C     | C     |
| 2       | A    | C    | C    | C     | T     |
| 3       | G    | T    | C    | C     | T     |
| 4       | A    | T    | C    | C     | T     |
| 5       | A    | C    | T    | T     | C     |
