# Supplementary material for: Tracking SARS-CoV-2 in Sewage: Evidence of Changes in Virus Variant Predominance during COVID-19 Pandemic
Source: MDPI journal article supplement (doi:10.3390/v12101144), 2020-10-09
Supplement: s1 [file s1]

## SARS-CoV-2 genome

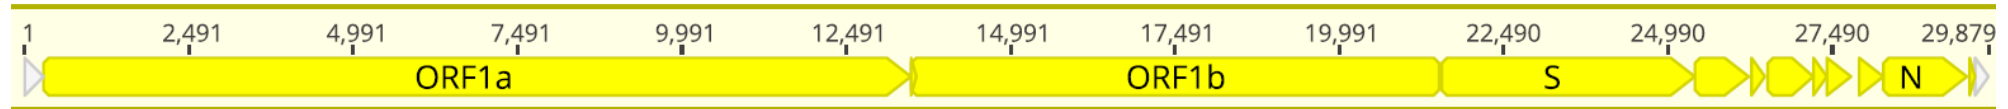

 NGS1F + NGS1R  
 NGS2F + NGS2R *nPCR1 (714 nt)*

| Primer Name | Genome nt. Position | Primer Sequence (5'-3')      |
|-------------|---------------------|------------------------------|
| COVID-NGS1F | 2267-2293           | GCAAAGGAAATTAAGGAGAGTGTTTCAG |
| COVID-NGS1R | 3243-3265           | AGTTGTCTGATTGTCCTCACTGC      |
| COVID-NGS2F | 2344-2368           | CATTATTGGTGGAGCTAAACTTAAAGCC |
| COVID-NGS2R | 3091-3118           | AGTACCATACTCATATTGAGTTGATGGC |
| COVID-NGS3F | 14266-14292         | ACGGAAGAGAGGTTAAACTCTTTGAC   |
| COVID-NGS3R | 15112-15139         | TCATAGTACTACAGATAGAGACACCAGC |
| COVID-NGS4F | 14342-14365         | GTTTGGATGACAGATGCATTCTGC     |
| COVID-NGS4R | 14889-14913         | GTTAGCATTAAATACAGCCACCATCG   |
| COVID-PCR1F | 14909-14932         | CTAACCAAGTCATCGTCAACAACC     |
| COVID-PCR1R | 16110-16134         | GTGTCCTGTTAACTCATCATGTAGC    |
| COVID-PCR2F | 15285-15312         | GGGTTGGGATTATCCTAAATGTGATAGA |
| COVID-PCR2R | 15840-15865         | GTCCTTTAGTAAGGTCAGTCTCAGTC   |
| COVID-PCR3F | 15488-15509         | GAGATGCCACAACCTGCTTATGC      |
| COVID-PCR3R | 15745-15769         | CCACTAGACCTTGAGATGCATAAGT    |
| COVID-PCR5F | 27917-27942         | AATCATCACAACTGTAGCTGCATTTC   |
| COVID-PCR5R | 28831-28853         | AACTGTTGCGACTACGTGATGAG      |
| COVID-PCR6F | 28099-28123         | CACCCATTAGTACATCGATATCGG     |
| COVID-PCR6R | 28736-28757         | GAAGTTGTAGCACGATTGCAGC       |

 NGS3F + NGS3R  
 NGS4F + NGS4R *nPCR2 (523 nt)*  
 PCR1F + PCR1R  
 PCR2F + PCR2R *nPCR3 (527 nt)*  
 PCR3F + PCR3R *nPCR4 (235 nt)*

PCR5F + PCR5R   
 PCR6F + PCR6R  *nPCR5 (612 nt)*
