# Supplementary material for: Tracking SARS-CoV-2 in Sewage: Evidence of Changes in Virus Variant Predominance during COVID-19 Pandemic
Source: MDPI journal article supplement (doi:10.3390/v12101144), 2020-10-09
Supplement: s1 [file s1]

**Table S1.** Number of whole-genome SARS-CoV-2 sequences by region/country and date of collection analysed in this study

| <b>Date</b>         | <b>England</b> | <b>Spain</b> | <b>Asia</b> | <b>USA</b> |
|---------------------|----------------|--------------|-------------|------------|
| <b>Up to Feb-20</b> | 114            | 17           | 1047        | 122        |
| <b>Mar-20</b>       | 6359           | 1399         | 1437        | 5737       |
| <b>Apr-20</b>       | 9244           | 354          | 1094        | 3980       |
| <b>May-20</b>       | 2364           | 36           | 618         | 1032       |
| <b>Total</b>        | 18081          | 1806         | 4196        | 10871      |
